# Supplementary material
Source: PubMed Central journal article supplement (PMC6250052)
Supplement: NIHMS1508887-supplement-1.pdf [file NIHMS1508887-supplement-1.pdf]

Supplementary Table 1: Human brain tissues information

| Clinical Dx | Case number | Gender | Age          | PMI(Hr)      | Braak Score |
|-------------|-------------|--------|--------------|--------------|-------------|
| Non-AD      | 42990       | F      | 84           | 14           | I           |
| Non-AD      | 45329       | M      | 78           | 21           | I           |
| Non-AD      | 39146       | F      | 67           | 12           | II          |
| Mean ± SE   |             | 2F/1M  | 76.33 ± 4.98 | 15.67 ± 2.72 |             |
| AD          | 46090       | F      | 75           | 27           | VI          |
| AD          | 46121       | F      | 74           | 16           | VI          |
| AD          | 47586       | F      | 78           | 18           | V           |
| Mean ± SE   |             | 3F/0M  | 75.67 ± 1.20 | 20.33 ± 3.38 |             |

Non-AD: Non Alzheimer's Disease; AD: Alzheimer's Disease; F: Female; M: Male; PMI: Post mortem interval; SE: Standard error.

**Supplementary Table 1.** The information of human brain tissues used in the experiments.
